# Supplementary material for: Effects of music on arousal during imagery in elite shooters: A pilot study
Source: PLoS One. 2017 Apr 17;12(4):e0175022. doi: 10.1371/journal.pone.0175022 (PMC5393549; doi:10.1371/journal.pone.0175022)
Supplement: S1 Table — (XLSX) [file pone.0175022.s001.xlsx]

## Sheet: Sheet1
Composer		Name
Unfamiliar Relaxing Music (URM):
	Copland	Appalachian Spring: Ballet for Martha
	Delius	Florida Suite: III Sunset - Near the Plantation
	Respighi	The Birds: The Dove
Unfamiliar Arousing Music (UAM):
	De Luca	Conquerors of the Ages: Attila the Hun
	Mussorgsky	The Great Gate of Kiev
	Shostakovich	Music from the Gadfly: Finale
Familiar Arousing Music (FAM):
	Orff	Carmina Burana: O Fortuna (orchestra only)
	Tchaikovsky	1812 Overture: Grand Finale
	Wagner	Die Walkure: The Ride of the Valkyries
