# Supplementary material for: Effects of music on arousal during imagery in elite shooters: A pilot study
Source: PLoS One. 2017 Apr 17;12(4):e0175022. doi: 10.1371/journal.pone.0175022 (PMC5393549; doi:10.1371/journal.pone.0175022)
Supplement: S2 Table — (XLSX) [file pone.0175022.s002.xlsx]

## Sheet: Sheet1
	Arousal			Familiarity			Preference
	URM	UAM	FAM	URM	UAM	FAM	URM	UAM	FAM
1	14	88	77	14	14	76	84	57	64
1	15	76	64	1	19	82	85	34	26
1	18	62	90	55	10	78	82	21	16
1	9	57	95	33	17	87	77	89	76
1	41	89	72	26	16	89	43	36	35
1	1	95	75	12	57	99	56	34	68
1	4	72	83	23	18	85	66	46	65
1	7	77	83	12	59	71	74	65	25
1	14	89	66	12	27	24	74	67	13
1	27	66	84	15	26	77	60	89	75
1	16	66	72	28	15	88	74	74	54
1	29	51	94	14	96	33.5	78	64	44
1	30	86	72	5	23	86.5	59	95	87
1	39	95	55	63	2	57.5	66	35	17
1	29	68	75	22	14	84	55	36	76
1	19	76	65	11	35	97	66	79	95
1	12	95	54	23	23	99	55	66	68
1	16	79	34	23	24	89.5	64	34	60
1	39	67	99	15	63	88	78	94.5	13
1	5	77	89	1	16	59	77	37.5	80
1	0	73	68	33	23	50	87	48	36
1	14	57	63	12	23	35	85	57	93
1	0	77	57	13	15	96	58	36.5	13
1	18	96	56	70	31	72	97	62	12
1	39	53	78	11	39	85	77	57.5	5
1	35	57	65	22	1	38	93	90	36
1	6	63	67	37	10	98	40	64.5	16
1	41	72	76	72	15	66	99	59	75
1	2	63	89	43	32	89	86	57	45
1	8	71	66	20	22	46	92	76	24
1	29	73	54	53	10	57	79	89.5	84
1	28	86	86	11	22	46	56	74	36
1	39	93	77	55	24.5	74	45	83	23.5
1	22	64	75	2	4	88	68	24.5	69.5
1	28	84	76	12	12	98	56	56	34
1	24	49	67	9	16	89	77	56.5	56
